# Supplementary material for: Household Coverage of Fortified Staple Food Commodities in Rajasthan, India
Source: PubMed Central journal article supplement (PMC5070859; doi:10.1371/journal.pone.0163176), 2016-10-19
Supplement: pone.0163176.s001.pdf [file pone.0163176.s001.pdf]

**IIHMR Health and Nutrition survey**  
**आईआईएचएमआर स्वास्थ्य एवं पोषण सर्वेक्षण**

**Informed Consent:** Greetings! I am \_\_\_\_\_ and I have come on behalf of Indian Institute of Health Management Research (IIHMR) Jaipur. We are carrying out a survey on health and nutrition. This discussion is expected to last approximately 15-20 minutes. Any information given by you will be kept confidential. Your participation in the survey is voluntary. However, we hope that you would take part in the survey since your participation is important. At any point in the survey if you feel that you're not ready to answer the question you can ask me to skip the question. At this point do you want to ask me anything about the survey? (Answer any question and address concerns of the respondent).

**TO BE FILLED IN BY INVESTIGATOR**

|                                     |                  |
|-------------------------------------|------------------|
| Village/town name: _____            |                  |
| psu Primary sampling unit  __ __ __ |                  |
| hh Household id  __ __              |                  |
| iid Investigator id  __ __          |                  |
| Investigator name: _____            | Signature: _____ |
| Date: _____                         |                  |

\*\*\*\*\*

**FOR OFFICE USE ONLY**

|                                   |                  |       |
|-----------------------------------|------------------|-------|
| <b>sid</b> Supervisor: _____      | Signature: _____ | __ __ |
| <b>feid</b> Field editor: _____   | Signature: _____ | __ __ |
| <b>oeif</b> Office editor: _____  | Signature: _____ | __ __ |
| <b>d1id</b> Data entry op1: _____ | Signature: _____ | __ __ |
| <b>d2id</b> Data entry op2: _____ | Signature: _____ | __ __ |

|             |                  |
|-------------|------------------|
| Remarks:    |                  |
|             |                  |
| Name: _____ | Signature: _____ |

Fill in the information about the sampled mother and the child:

|        | Name | Sex<br>(M=1,<br>F=2) | Completed<br>age<br>(years) | Completed age<br>(months) | Ever<br>attended<br>school or<br>college? | Currently<br>attending<br>school or<br>college? | 5 or more<br>years of<br>education? |
|--------|------|----------------------|-----------------------------|---------------------------|-------------------------------------------|-------------------------------------------------|-------------------------------------|
| mother |      | _                    | _   _                       |                           | _                                         | _                                               | _                                   |
| child  |      | _                    |                             | _   _                     |                                           |                                                 |                                     |

Who are family members that live with you now or mostly live with you?  
Complete one line of the roster for each remaining household member:

|    | Name | Sex<br>(M=1,<br>F=2) | Completed<br>age<br>(years) | Completed age<br>(months) | For persons aged $\geq$ 5 years           |                                                 |                                     |
|----|------|----------------------|-----------------------------|---------------------------|-------------------------------------------|-------------------------------------------------|-------------------------------------|
|    |      |                      |                             |                           | Ever<br>attended<br>school or<br>college? | Currently<br>attending<br>school or<br>college? | 5 or more<br>years of<br>education? |
| 1  |      | _                    | _   _                       | _   _                     | _                                         | _                                               | _                                   |
| 2  |      | _                    | _   _                       | _   _                     | _                                         | _                                               | _                                   |
| 3  |      | _                    | _   _                       | _   _                     | _                                         | _                                               | _                                   |
| 4  |      | _                    | _   _                       | _   _                     | _                                         | _                                               | _                                   |
| 5  |      | _                    | _   _                       | _   _                     | _                                         | _                                               | _                                   |
| 6  |      | _                    | _   _                       | _   _                     | _                                         | _                                               | _                                   |
| 7  |      | _                    | _   _                       | _   _                     | _                                         | _                                               | _                                   |
| 8  |      | _                    | _   _                       | _   _                     | _                                         | _                                               | _                                   |
| 9  |      | _                    | _   _                       | _   _                     | _                                         | _                                               | _                                   |
| 10 |      | _                    | _   _                       | _   _                     | _                                         | _                                               | _                                   |
| 11 |      | _                    | _   _                       | _   _                     | _                                         | _                                               | _                                   |
| 12 |      | _                    | _   _                       | _   _                     | _                                         | _                                               | _                                   |
| 13 |      | _                    | _   _                       | _   _                     | _                                         | _                                               | _                                   |
| 14 |      | _                    | _   _                       | _   _                     | _                                         | _                                               | _                                   |
| 15 |      | _                    | _   _                       | _   _                     | _                                         | _                                               | _                                   |
| 16 |      | _                    | _   _                       | _   _                     | _                                         | _                                               | _                                   |

Check the roster regarding completeness!

re : What is your religion? *Tick one box only!*

|                   |                          |      |
|-------------------|--------------------------|------|
| Hindu             | <input type="checkbox"/> | re=1 |
| Muslim            | <input type="checkbox"/> | re=2 |
| Sikh              | <input type="checkbox"/> | re=3 |
| Christian         | <input type="checkbox"/> | re=4 |
| Jain              | <input type="checkbox"/> | re=5 |
| Buddhist          | <input type="checkbox"/> | re=6 |
| None              | <input type="checkbox"/> | re=7 |
| Prefer not to say | <input type="checkbox"/> | re=8 |
| Other             | <input type="checkbox"/> | re=9 |

**MPI (Assets) Data**

mpi1 : Does your household have electricity?

mpi2 : What fuels does your household use for cooking?  
(If dirty fuel used then tick **only** for dirty fuel.)

|                                       |   |                          |        |                          |
|---------------------------------------|---|--------------------------|--------|--------------------------|
| Electricity                           | } | <input type="checkbox"/> |        |                          |
| Gas (LPG)                             |   | }                        | mpi2=1 |                          |
| Biogas (Gobar gas)                    |   |                          |        |                          |
| Kerosene                              |   |                          |        |                          |
| Solar                                 |   |                          |        |                          |
| Coal / lignite                        | } |                          |        | <input type="checkbox"/> |
| Charcoal                              |   | }                        | mpi2=2 |                          |
| Wood                                  |   |                          |        |                          |
| Straw / shrubs / grass / crop residue |   |                          |        |                          |
| Animal dung                           |   |                          |        |                          |

mpi3 : Main material of the floor of the dwelling?

*Tick **one** box only ...*

|                                       |                          |        |
|---------------------------------------|--------------------------|--------|
| Dirt / earth / sand / dung / mixed    | <input type="checkbox"/> | mpi3=1 |
| Other (tiles, concrete, cement, wood) | <input type="checkbox"/> | mpi3=2 |

mpi4 : Does your household have ... ? *Fill in **all** boxes!*

**Prompt** for each item.

|                                      |                          |       |
|--------------------------------------|--------------------------|-------|
| A radio?                             | <input type="checkbox"/> | mpi4a |
| A television?                        | <input type="checkbox"/> | mpi4b |
| A mobile or any other telephone?     | <input type="checkbox"/> | mpi4c |
| A bicycle or a tricycle?             | <input type="checkbox"/> | mpi4d |
| A motorcycle, scooter, auto-rikshaw? | <input type="checkbox"/> | mpi4e |
| A car, truck, jeep, or tractor?      | <input type="checkbox"/> | mpi4f |
| A refrigerator?                      | <input type="checkbox"/> | mpi4g |
| A computer / laptop / tablet         | <input type="checkbox"/> | mpi4h |
| A horse/ox/camel/mule/donkey cart?   | <input type="checkbox"/> | mpi4i |

## Short Birth History

The purpose of the short birth history (SBH) component is to determine whether any child that was recently born to the respondent has died within the past five years.

Tell the mother :

*I will be asking about your recent births.*

*I am interested in your three most recent births.*

*I am interested in all children that were born alive.*

Ask the following questions :

*When was your most recent birth?*

*Where is this child now?*

If **DEAD** then **record the death (YES) in d1** below and **GO TO w1**

*Did you have a birth before this most recent one?*

If **NO** (no previous birth) then record **NO in d1** below and **GO TO w1**

If **YES:** *Where is this child now?*

If **DEAD** then **record the death (YES) in d1** below and **GO TO w1**

*Did you have a birth before that one?*

If **NO** (no previous birth) then record **NO in d1** and **GO TO w1**

If **YES:** *Where is this child now?*

If **DEAD** then **record the death (YES) in d1** below and **GO TO w1**

**d1** : A recently born child has died :

| □ |

**Water, Sanitation, and Hygiene (WASH)**

**w1** : What is the **main source** of drinking water for you and your child?

Do not prompt!

Tick **one box** only!

- Piped water into dwelling / Tap
- Piped water into yard / plot / compound
- Public tap
- Standpipe
- Tube-well
- Borehole
- Protected dug well/spring
- Rainwater collection system
- Bottled water / sachet water

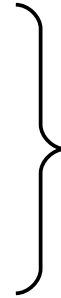

w1=1

- Unprotected dug well/spring
- Cart with small tank or drum
- Tanker-truck
- River or stream
- Dam, lake, or pond
- Canal or irrigation channel
- Other

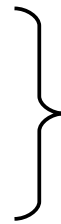

w1=2

**w2** : What do you **usually** do to the water to make it safer to drink?

Do not prompt

Probe: 'Anything else?'

Tick **one box** only ...

- Boil
- Add bleach / chlorine tablet
- Use a water filter / gravel / ceramic / sand
- Solar disinfection

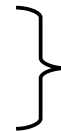

w2= 1

- Strain it through a cloth **only**
- Let it stand and settle **only**
- Nothing
- Don't know
- Other

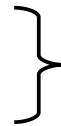

w2= 2

**w3** : What kind of toilet facility do members of your household **usually** use?

Do not prompt

Tick **one box** only ...

Flush or pour flush into:

- Piped sewer system
- Septic tank
- Pit latrine
- Don't know

- Pit latrine with slab
- VIP Latrine
- Composting toilet

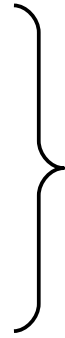

|\_\_|  
w3=1

Flush or pour flush into:

Elsewhere (not specified above)

- Pit latrine **without** slab
- Bucket
- Hanging latrine
- Bush, field, or no facilities → **tick [YES] w4**

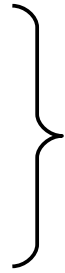

|\_\_|  
w3=2

**w4** : Do you share this facility with other households?

|\_\_|

**Household Hunger Scale (Food Security)**

**hh1** : How many times in the last month was there ever no food to eat of any kind in your house because of lack of resources to get food?

Number of times :

|\_\_|\_\_|

(RECORD 00 FOR "NONE")

**hh2** : How many times in the last month did you go to sleep at night hungry because there was not enough food?

Number of times :

|\_\_|\_\_|

(RECORD 00 FOR "NONE")

**hh3** : How many times in the last month did you go a whole day and night without eating anything at all because there was not enough food?

Number of times :

|\_\_|\_\_|

(RECORD 00 FOR "NONE")

**Infant and Young Child Feeding (IYCF)**

**f1** : Is [NAME OF CHILD] currently breastfed?

**f2** : Does [NAME OF CHILD] take any food or drink other than breastmilk?

**f3** : How many times was [NAME OF CHILD] fed mashed or pureed food or solid or semi-solid food as a meal or a snack since this time yesterday?

Number of times :

(RECORD 00 FOR "NO FOOD")

## Mother and Child Dietary Diversity

Since this time yesterday what food did you and [NAME OF CHILD] eat?

Probe: "Did you have any of the following things to eat or drink" for items not mentioned

\*Check whether mother and child vegetarian or not to avoid offense in DD10-12

**Tick or cross ALL boxes!**

|      |                                                                                                                                                                                                                                                                                                  | Mother                   | Child                    |
|------|--------------------------------------------------------------------------------------------------------------------------------------------------------------------------------------------------------------------------------------------------------------------------------------------------|--------------------------|--------------------------|
| DD01 | Plain water?                                                                                                                                                                                                                                                                                     | <input type="checkbox"/> | <input type="checkbox"/> |
| DD02 | Tinned, powdered or fresh milk (excluding breast milk), Cares or infant formula such as Cerelac, Lactogen, Mother Dairy, Nan Pro (Nestlé)                                                                                                                                                        | <input type="checkbox"/> | <input type="checkbox"/> |
| DD03 | Tea or infusion, light soup, sweetened or flavoured water, sodas, malt drinks (Horlicks), coffee, janam ghutti, nimou, liquor, beer                                                                                                                                                              | <input type="checkbox"/> | <input type="checkbox"/> |
| DD04 | Any food made from grain such as millet (bajra), wheat, rice, maize, semolina, atta flour, maggi noodles, porridge, jau                                                                                                                                                                          | <input type="checkbox"/> | <input type="checkbox"/> |
| DD05 | Any food made from fruits or vegetables that have yellow or orange flesh such as red carrots, kachar, red sweet potatoes, ripe mangoes, ripe papaya, balam kakdi, khadoo, kachri                                                                                                                 | <input type="checkbox"/> | <input type="checkbox"/> |
| DD06 | Any dark green leafy vegetables (palak, methi, cholei, sarso, bathua, sejan, spring onion and radish leaves)                                                                                                                                                                                     | <input type="checkbox"/> | <input type="checkbox"/> |
| DD07 | Any food made from roots or tubers such as arbi, moli, jimmikand (white), white potatoes, white sweet potato, onions, ginger                                                                                                                                                                     | <input type="checkbox"/> | <input type="checkbox"/> |
| DD08 | Any food made from lentils, beans, Bengal gram, channa, urad, peas, green gram, horse gram, besan, moong, soya bean, ker, cowpea, sattu, peanut paste, kichari, nuts, or seeds                                                                                                                   | <input type="checkbox"/> | <input type="checkbox"/> |
| DD09 | Any other fruits or vegetables (coconut, apple, green mango, banana, pomegranate, lemon, guava, brinjal, tomatoes, beetroot, fali, tinda, kakri, parwal, gilki, peppers, singara, lal sag, lauki, toru, guar, gawanar, kakdi, cauliflower, cabbage, cucumbers, sweet corn, sangri, kudu, bjindi) | <input type="checkbox"/> | <input type="checkbox"/> |
| DD10 | Liver, kidney, heart, or other organ meats                                                                                                                                                                                                                                                       | <input type="checkbox"/> | <input type="checkbox"/> |
| DD11 | Any meat such as chicken, goat, sheep, teetar, beef, pork                                                                                                                                                                                                                                        | <input type="checkbox"/> | <input type="checkbox"/> |
| DD12 | Fresh or dried fish, shellfish, or seafood, crabs, frogs, lizards and snakes, grubs                                                                                                                                                                                                              | <input type="checkbox"/> | <input type="checkbox"/> |
| DD13 | Curd, lassi, yoghurt, chaach, cheese, paneer, mawa barfi, shrikhand or other milk products                                                                                                                                                                                                       | <input type="checkbox"/> | <input type="checkbox"/> |
| DD14 | Eggs.                                                                                                                                                                                                                                                                                            | <input type="checkbox"/> | <input type="checkbox"/> |
| DD15 | Sugary foods such as biscuits, sweets, candies, sugar cane, cakes, and chocolate                                                                                                                                                                                                                 | <input type="checkbox"/> | <input type="checkbox"/> |
| DD16 | Any food made with oil, fat, butter, or ghee                                                                                                                                                                                                                                                     | <input type="checkbox"/> | <input type="checkbox"/> |
| DD17 | Red palm oil                                                                                                                                                                                                                                                                                     | <input type="checkbox"/> | <input type="checkbox"/> |



**FLOUR FORTIFICATION COVERAGE**

**ff1** : Ask the mother:

*What types of flour does your household have now? Fill in **ALL** boxes!*

*What is the main flour consumed by your household? Tick **ONE** box only!  
\*If two main flours consumed, give preference to atta wheat flour!*

*Where do the flours come from? Fill in **ALL RELEVANT** boxes!*

|             |                   | <b>Have now</b> | <b>Main flour</b> | <b>Where from</b> | <b>Codes for "where from":</b><br><br>1 = Ground grains at home<br>2 = Ground grains at chakki<br>3 = PDS/ration shop<br>4 = Purchased from market/retailer<br>5 = Other |
|-------------|-------------------|-----------------|-------------------|-------------------|--------------------------------------------------------------------------------------------------------------------------------------------------------------------------|
| <b>ff1a</b> | Raj Atta flour    | __              | __                | __                |                                                                                                                                                                          |
| <b>ff1b</b> | Atta wheat flour  | __              | __                | __                |                                                                                                                                                                          |
| <b>ff1c</b> | Maida wheat flour | __              | __                | __                |                                                                                                                                                                          |
| <b>ff1d</b> | Millet flour      | __              | __                | __                |                                                                                                                                                                          |
| <b>ff1e</b> | Maize flour       | __              | __                | __                |                                                                                                                                                                          |
| <b>ff1f</b> | Barley flour      | __              | __                | __                |                                                                                                                                                                          |
| <b>ff1g</b> | Mixed flour       | __              | __                | __                |                                                                                                                                                                          |
| <b>ff1h</b> | Other: _____      | __              | __                | __                |                                                                                                                                                                          |
| <b>ff1i</b> | Other: _____      | __              | __                | __                |                                                                                                                                                                          |

*If **NO** to **Raj** atta (have and main) but **YES** to **atta** wheat (have **OR** main) → **GO TO ff4***

*If **NO** **Raj** atta **AND** **NO** **atta** wheat flour → **GO TO ff10***

*If **YES** to **Raj** atta wheat (have **OR** main) → **GO TO ff2***

**ff2** : For the most recent major purchase of Raj atta, how much did your household buy?

Amount in kilos (kg):

|\_\_|\_\_|\_\_|

**ff3** : How long does this amount usually last in your household?

Number of days: |||

If **YES** to **atta** (have **OR** main) in ff1b → **GO TO ff4**

If **NO** to **atta** (main **AND** have) in ff1b → **GO TO ff9 and take a sample**

**ff4** : For the most recent major purchase/grinding of atta wheat flour, how was the flour packaged? Tick **one box** only!

- Ground own, or at chakki  ff5=1
- Don't know  ff5=2
- "Open" flour (any quantity)  ff5=3
- Packaged flour (any quantity)  ff5=4
- Other  ff5=5

**ff5** : For the most recent major purchase/grinding of atta wheat flour, how much did your household buy/grind?

Amount in kilos (kg): |||.||

**ff6** : How long does this amount usually last in your household?

Number of days: |||

**ff7** : Can you tell me the brand? Tick **one box** only!

- Unbranded / grind at home or at chakki → **GO TO ff10**  ff8=1
- Don't know brand (e.g. if open flour or someone else purchased)  ff8=2
- Lakshmi Bhog  ff8=3
- Aashirvaad  ff8=4
- Shree Bhog  ff8=5
- Swastik  ff8=6
- Balaji  ff8=7
- Other-specify: \_\_\_\_\_  ff8=8

**ff8** : Do you have any of above mentioned flour available right now?

if **YES** → **GO TO ff9**, if **NO** → **GOTO ff10**

**ff9** : May I take a small sample?

If **YES** → Record the PSU ID and Household ID below and on the sachet

**ff9sn**

Sample number: |||/|||  
PSU ID HH ID

**ff10** : Ask the mother:

*In the last 7 days how many times did you and [NAME OF CHILD] eat products made from maida, such as [food item]?*

*If frequency = 0, don't ask the portion size!*

*Usually how much of [food item] did you and [NAME OF CHILD] eat at one sitting? Show pictures!*

|              | Food item     | Mother              |              | Child               |              |
|--------------|---------------|---------------------|--------------|---------------------|--------------|
|              |               | Frequency (# times) | Portion size | Frequency (# times) | Portion size |
| <b>ff10a</b> | Biscuits      | _ _                 | _ _          | _ _                 | _ _          |
| <b>ff10b</b> | Toast / Rusk  | _ _                 | _ _          | _ _                 | _ _          |
| <b>ff10c</b> | Bread         | _ _                 | _ _          | _ _                 | _ _          |
| <b>ff10d</b> | Samosa        | _ _                 | _ _          | _ _                 | _ _          |
| <b>ff10e</b> | Maggi Noodles | _ _                 | _ _          | _ _                 | _ _          |
| <b>ff10f</b> | Jalebi        | _ _                 | _ _          | _ _                 | _ _          |
| <b>ff10g</b> | Fen           | _ _                 | _ _          | _ _                 | _ _          |
| <b>ff10h</b> | Matri         | _ _                 | _ _          | _ _                 | _ _          |
| <b>ff10i</b> | Kachori       | _ _                 | _ _          | _ _                 | _ _          |
| <b>ff10j</b> | Shakar Pare   | _ _                 | _ _          | _ _                 | _ _          |
| <b>ff10k</b> | Naan          | _ _                 | _ _          | _ _                 | _ _          |
| <b>ff10l</b> | Pav           | _ _                 | _ _          | _ _                 | _ _          |
| <b>ff10m</b> | Kulcha        | _ _                 | _ _          | _ _                 | _ _          |
| <b>ff10n</b> | Patties       | _ _                 | _ _          | _ _                 | _ _          |
| <b>ff10o</b> | Bun           | _ _                 | _ _          | _ _                 | _ _          |
| <b>ff10p</b> | Pizza         | _ _                 | _ _          | _ _                 | _ _          |

**Probe:** Did you eat anything else made from maida (e.g. bathura, balushai, gujiya etc)?

*Usually how much of the [food item] did you and [NAME OF CHILD] eat at one sitting?*

|              | Food item    | Mother | Child |     | Food item |
|--------------|--------------|--------|-------|-----|-----------|
| <b>ff10q</b> | Other: _____ | _ _    | _ _   | _ _ | _ _       |
| <b>ff10r</b> | Other: _____ | _ _    | _ _   | _ _ | _ _       |

## OIL FORTIFICATION COVERAGE

**of1** : Ask the mother:

What types of edible oils does your household have now? Fill in **ALL boxes!**

What is the main edible oil consumed by your household? Tick **ONE box only!**  
If using *Desi ghee + other oil*, give priority to other oil as the main oil

Where did the oils come from? Fill in **ALL relevant boxes!**

|             | Oil type             | Have now | Main oil | Where from | Codes for "where from":                                                                                                                          |
|-------------|----------------------|----------|----------|------------|--------------------------------------------------------------------------------------------------------------------------------------------------|
| <b>of1a</b> | Soya-bean oil        | __       | __       | __         | 1 = Produced at home<br>2 = Purchased from market/retailer<br>3 = PDS/ration shop<br>4 = Other<br><br>→ if Desi Ghee = main oil then move to mil |
| <b>of1b</b> | Mustard seed oil     | __       | __       | __         |                                                                                                                                                  |
| <b>of1c</b> | Sesame seed oil      | __       | __       | __         |                                                                                                                                                  |
| <b>of1d</b> | Groundnut oil        | __       | __       | __         |                                                                                                                                                  |
| <b>of1e</b> | Sunflower oil        | __       | __       | __         |                                                                                                                                                  |
| <b>of1f</b> | Rice-bran oil        | __       | __       | __         |                                                                                                                                                  |
| <b>of1g</b> | Vegetable blend oil  | __       | __       | __         |                                                                                                                                                  |
| <b>of1h</b> | Palm oil             | __       | __       | __         |                                                                                                                                                  |
| <b>of1i</b> | Vanaspati Ghee/Dalda | __       | __       | __         |                                                                                                                                                  |
| <b>of1j</b> | Desi Ghee            | __       | __       | __         |                                                                                                                                                  |
| <b>of1k</b> | Don't know           | __       | __       | __         |                                                                                                                                                  |
| <b>of1l</b> | Other _____          | __       | __       | __         |                                                                                                                                                  |
| <b>of1m</b> | Other _____          | __       | __       | __         |                                                                                                                                                  |

**of2** : For the most recent major purchase of [main oil type], how was the oil packaged? Tick **one box only!**

|                            |    |       |
|----------------------------|----|-------|
| Produce oil at home        | __ | of2=1 |
| Don't know                 | __ | of2=2 |
| "Open" oil (any quantity)  | __ | of2=3 |
| User pack of 5L/kg or less | __ | of2=4 |
| User pack of 10L/kg        | __ | of2=5 |
| Tin of 15L/kg or bigger    | __ | of2=6 |
| Other: _____               | __ | of2=7 |

**OIL FORTIFICATION COVERAGE**

**of3** : For the most recent major purchase/home production of [main oil type], how much did your household buy/produce?

Quantity: |\_|\_|\_|\_|. |\_|\_|\_|

Units: |\_|\_|  
L=1, kg=2

**of4** : How long does this amount usually last in your household?

Number of days: |\_|\_|\_|\_|

**of5** : Can you tell me the brand?

- Unbranded / made at home |\_|\_| of5=1
- Don't know (e.g. if open or someone else purchased it) |\_|\_| of5=2
- Chambal |\_|\_| of5=3
- Fortune |\_|\_| of5=4
- Mahakosh |\_|\_| of5=5
- Parampara |\_|\_| of5=6
- Engine |\_|\_| of5=7
- Other: \_\_\_\_\_ |\_|\_| of5=8

**MILK**

**mi1** : Where does your household usually get milk?

- Home production |\_|\_| mi1=1
- Market/retailer |\_|\_| mi1=2
- SARAS |\_|\_| mi1=3
- Lotus |\_|\_| mi1=4
- Amul |\_|\_| mi1=5
- Divya |\_|\_| mi1=6
- Onest |\_|\_| mi1=7
- Mother dairy |\_|\_| mi1=8
- Gift/Relief |\_|\_| mi1=9
- Don't know |\_|\_| mi1=10
- Other |\_|\_| mi1=11

**SALT FORTIFICATION COVERAGE**

**sf1** : The last time your household purchased salt, how was it packaged?

Tick one box only!

|             |                          |       |
|-------------|--------------------------|-------|
| Packed salt | <input type="checkbox"/> | sf1=1 |
| Open salt   | <input type="checkbox"/> | sf1=2 |
| Don't know  | <input type="checkbox"/> | sf1=3 |

**sf2** : Can you tell me the brand? Tick one box only!

|              |                          |       |
|--------------|--------------------------|-------|
| Tata         | <input type="checkbox"/> | sf2=1 |
| Bhaskar      | <input type="checkbox"/> | sf2=2 |
| Surya        | <input type="checkbox"/> | sf2=3 |
| Saffola      | <input type="checkbox"/> | sf2=4 |
| Captain Cook | <input type="checkbox"/> | sf2=5 |
| Don't know   | <input type="checkbox"/> | sf2=6 |
| Other: _____ | <input type="checkbox"/> | sf2=7 |

**sf3** : May I take a small sample?

**If YES** → Record the PSU ID and Household ID below and on the sachet

**sf3sn** Sample number: |\_\_|\_\_|\_\_|/|\_\_|\_\_|  
PSU ID HH ID

**Mother and Child Health and Nutrition Data**

|               | <b>Mother</b>                                                                                                                                                                                                                                                                                                           | <b>Child</b>                                                                                                                                                                                                            |
|---------------|-------------------------------------------------------------------------------------------------------------------------------------------------------------------------------------------------------------------------------------------------------------------------------------------------------------------------|-------------------------------------------------------------------------------------------------------------------------------------------------------------------------------------------------------------------------|
| <b>VAS</b>    | NOT APPLICABLE                                                                                                                                                                                                                                                                                                          | <b>SHOW:</b> vitamin A syrup<br>Took in past 6 months?  __                                                                                                                                                              |
| <b>FEFOL</b>  | <b>SHOW:</b> Iron tablet<br>Took during pregnancy?  __ <br>Number received:  __ __ __ <br>Number used:  __ __ __ <br>Enter: 777 if don't know                                                                                                                                                                           | NOT APPLICABLE                                                                                                                                                                                                          |
| <b>OEDEMA</b> | NOT TAKEN                                                                                                                                                                                                                                                                                                               | Oedema present  __ <br>If oedema <b>YES</b> → <b>Refer!</b><br>Enter 8 if refused                                                                                                                                       |
| <b>BCG</b>    | NOT TAKEN                                                                                                                                                                                                                                                                                                               | BCG scar  __ <br><b>Note:</b> Check left arm for scar<br>Enter 8 if refused                                                                                                                                             |
| <b>MUAC</b>   | <b>Note:</b> Take MUAC on the <b>left</b> arm<br> __ __ __  mm<br>Enter:<br>777 if MUAC too big<br>888 if mother refused<br><br>How was MUAC taken?<br>Bare  __  muact=1<br>Clothing (thin)  __  muact=2<br>Clothing thick  __  muact=3<br>Bangle  __  muact=4<br><br>If mother <b>MUAC &lt; 210 mm</b> → <b>REFER!</b> | <b>Note:</b> Take MUAC on either arm<br> __ __ __  mm<br>Enter 888 if refused<br><br>Refer child to health facility if:<br><b>&lt;6 months</b> and MUAC < <b>110 mm</b><br><b>&gt;6 months</b> and MUAC < <b>115 mm</b> |
| <b>HC</b>     | NOT APPLICABLE                                                                                                                                                                                                                                                                                                          | Mother child protection card  __                                                                                                                                                                                        |

**\*\*\* CHECK THE QUESTIONNAIRE & THANK THE MOTHER!\*\*\***
